# Supplementary material for: C60fullerene localization and membrane interactions in RAW 264.7 immortalized mouse macrophages
Source: Royal Society of Chemistry journal article supplement (doi:10.1039/c5nr07003a), 2016-01-01
Supplement: c5nr07003a1.pdf [file c5nr07003a1.pdf]

## Supporting Information

### **C60 Fullerene Localization and Membrane Interactions in RAW 264.7 Immortalized Mouse Macrophages**

*Kristen A. Russ,<sup>1</sup> Paolo Elvati,<sup>2</sup> Tina L. Parsonage,<sup>3,4</sup> Ariel Dews,<sup>1</sup> James A. Jarvis,<sup>3,4</sup> Myah Ray,<sup>1</sup> Brandon Schneider,<sup>1</sup> Peter J.S. Smith,<sup>3,4</sup> Philip T. F. Williamson,<sup>3,4\*</sup> Angela Violi,<sup>2,5†</sup> Martin Philbert<sup>1‡</sup>*

<sup>1</sup> Toxicology Program, School of Public Health, University of Michigan, Ann Arbor, MI

<sup>2</sup> Mechanical Engineering, University of Michigan, Ann Arbor, MI

<sup>3</sup> Centre for Biological Science, University of Southampton, Highfield Campus, SO17 1BJ

<sup>4</sup> Institute for Life Sciences, University of Southampton, Highfield Campus, SO17 1BJ

<sup>5</sup> Chemical Engineering, Biomedical Engineering, Biophysics, University of Michigan, Ann Arbor MI

---

\* P.T.Williamson@soton.ac.uk

† [avioli@umich.edu](mailto:avioli@umich.edu)

‡ [philbert@umich.edu](mailto:philbert@umich.edu)

(A)

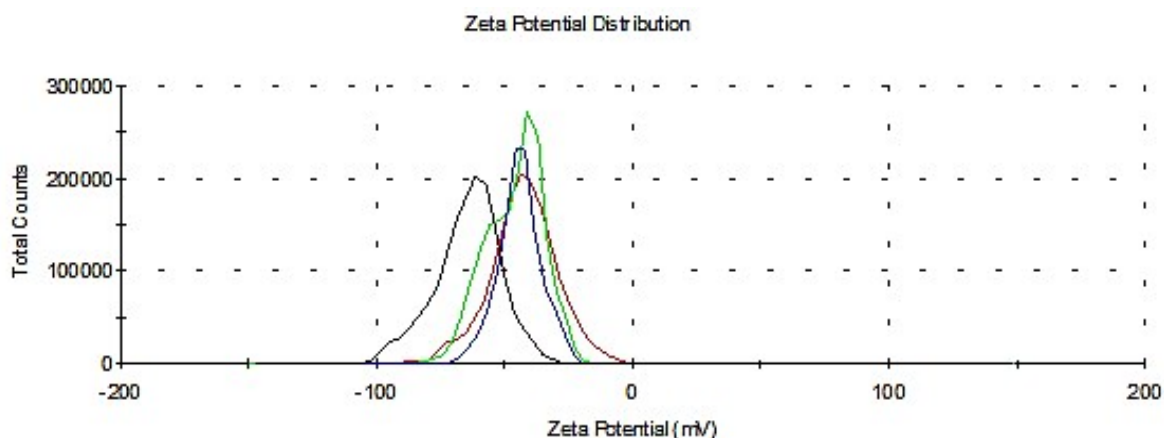

(B)

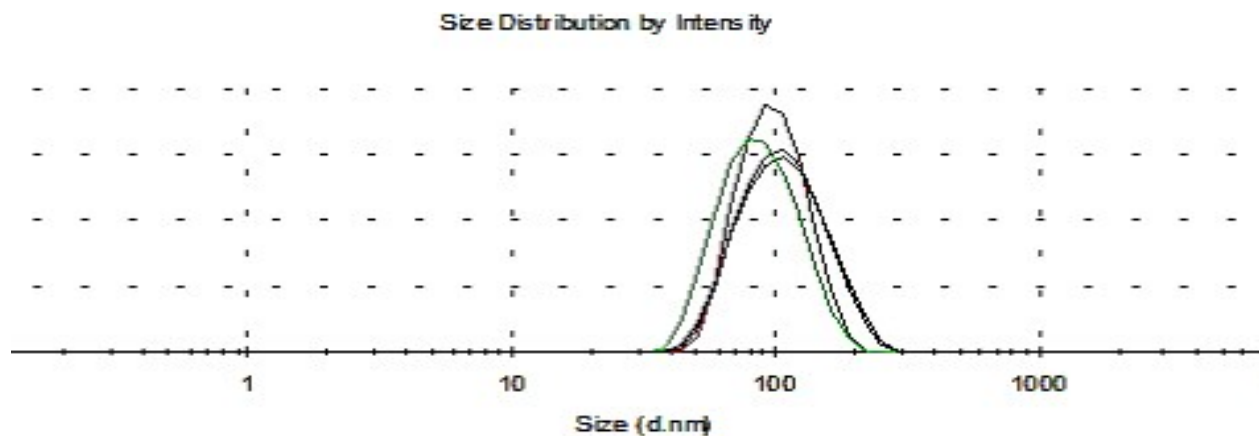

**Figure S1.** Characterization of C<sub>60</sub> Fullerenes and Terbium-Endohedral Fullerenes. (A) Zeta potential of C<sub>60</sub> fullerenes and terbium-endothedral fullerenes. The average zeta potential of the C<sub>60</sub> fullerenes (red, blue, green) was -44.3 mV, with -64.3 mV for the terbium-endothedral fullerenes (black). The similar sign and measurement of the zeta potential predict that the particles behave similarly. (B) Size distribution of C<sub>60</sub> fullerenes and terbium-endothedral fullerenes by the Malvern Zetasizer. The average aggregate size of C<sub>60</sub> fullerenes (red, blue, green) was 91.13 nm, with 99.31 nm for the terbium-endothedral fullerenes (black).

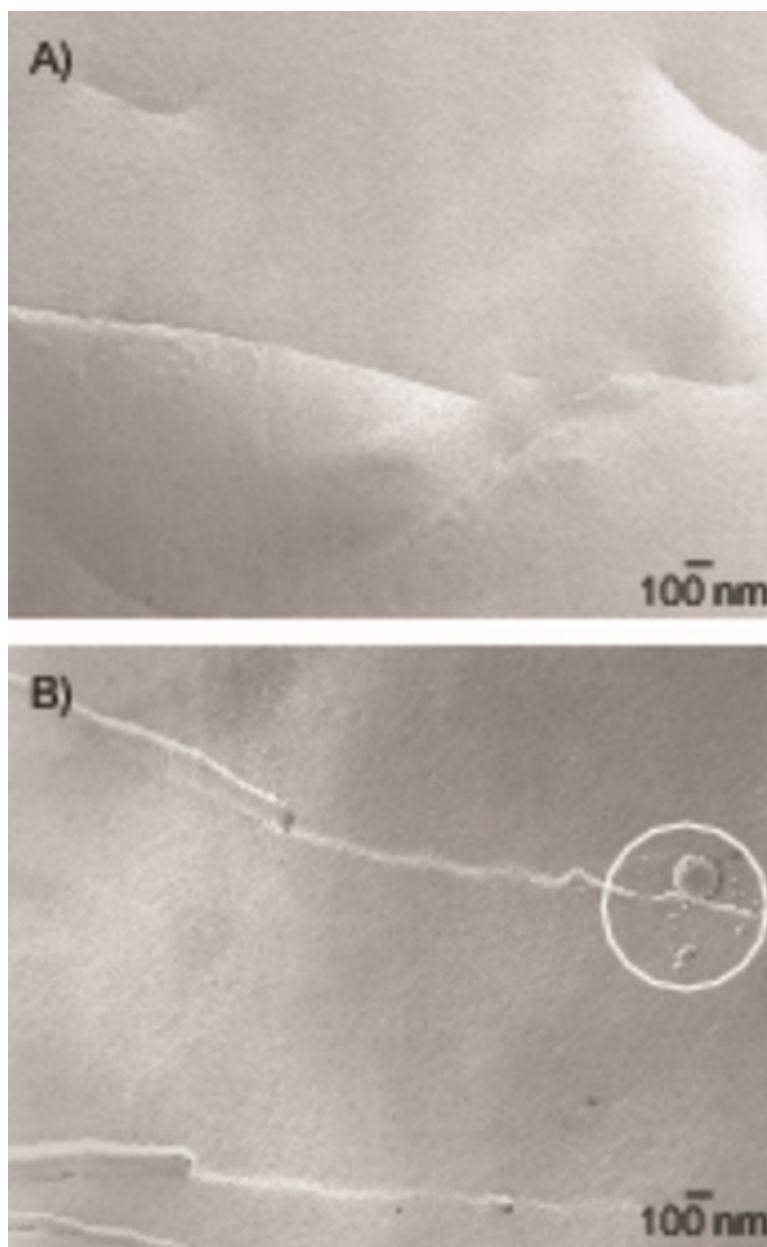

**Figure S2.** Freeze-Fracture Transmission Electron Microscopy on RAW 264.7 Cells. (A) Control cells. (B) Cells exposed to 0.5  $\mu\text{g/mL}$  terbium-encapsulated fullerenes. Fullerenes entering the membrane space are circled.

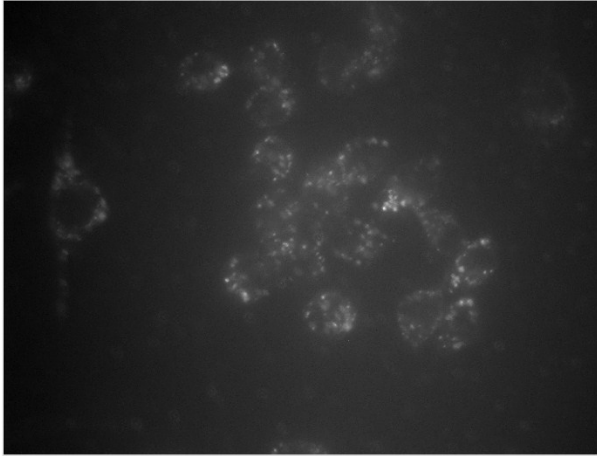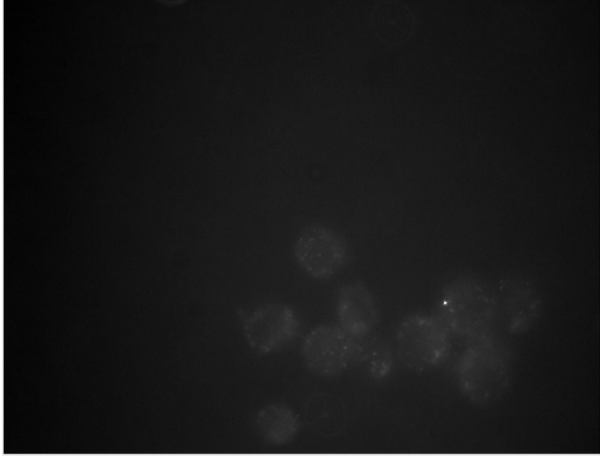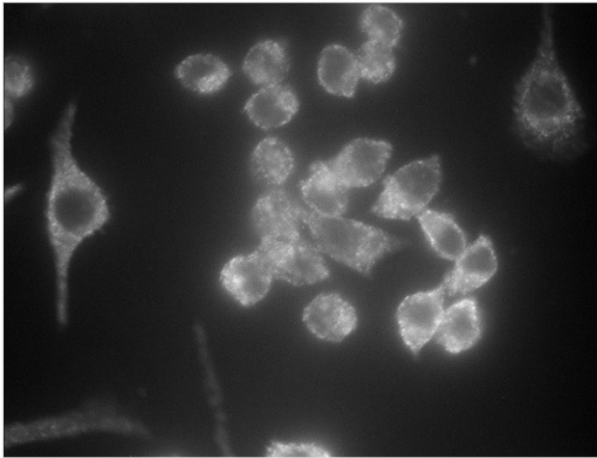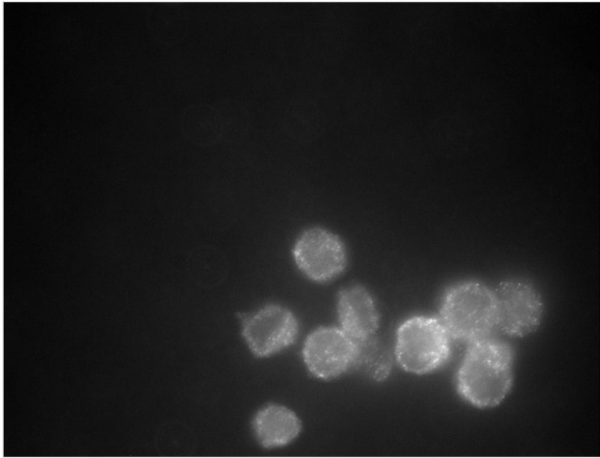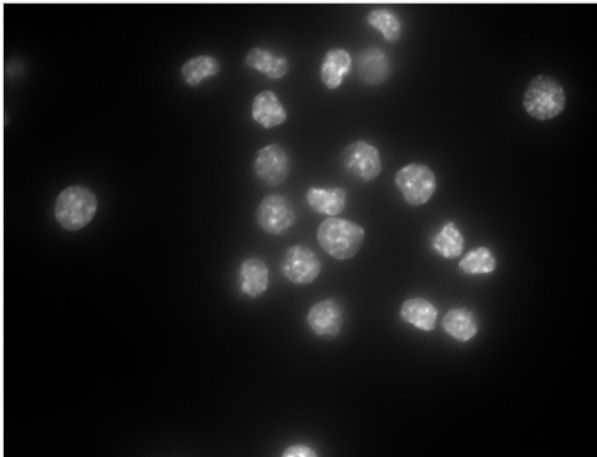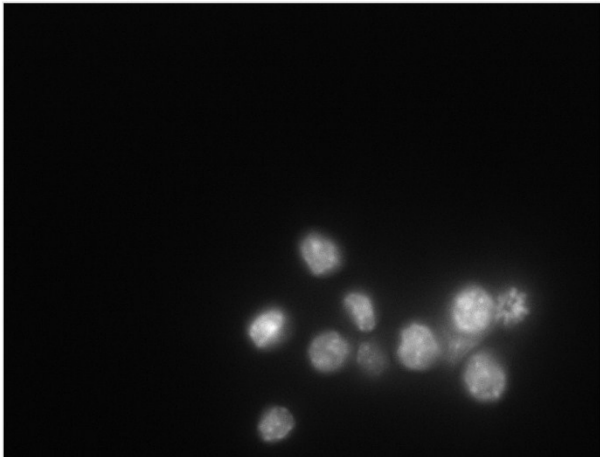

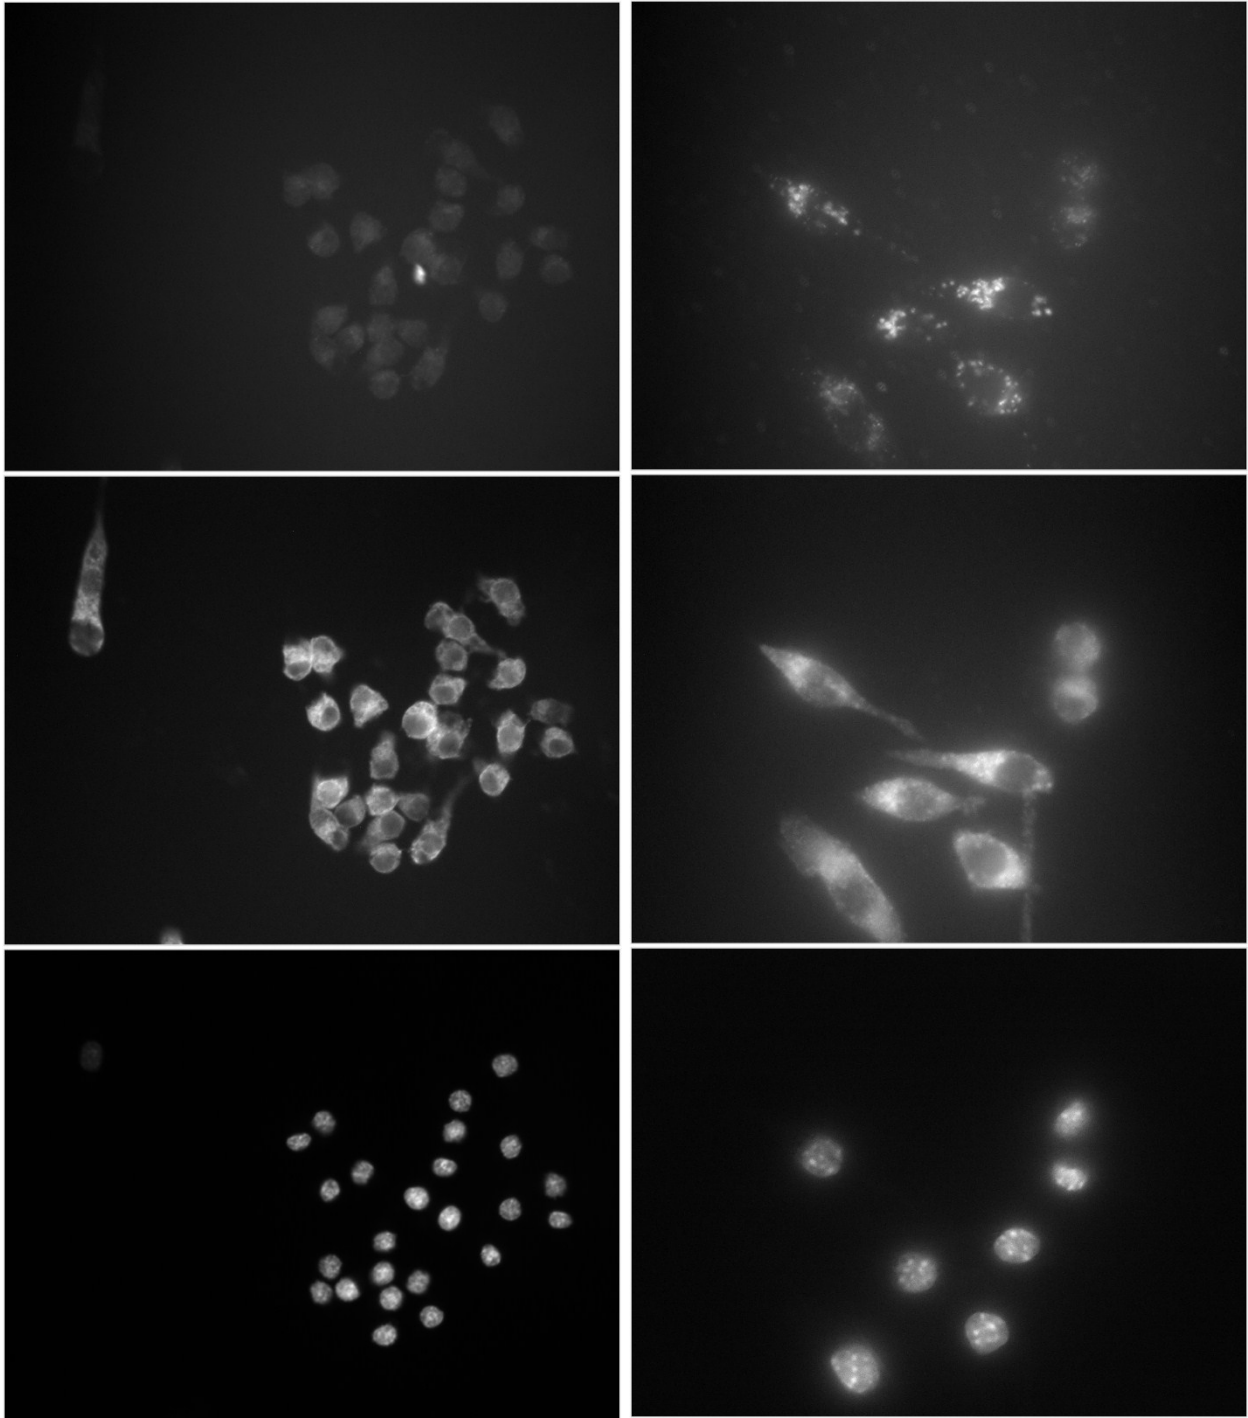

**Figure S3.** Red (top), green (middle) and blue (bottom) channel of the epifluorescent images of immortalized RAW 264.7 macrophages shown in Figure 3 of the main text.

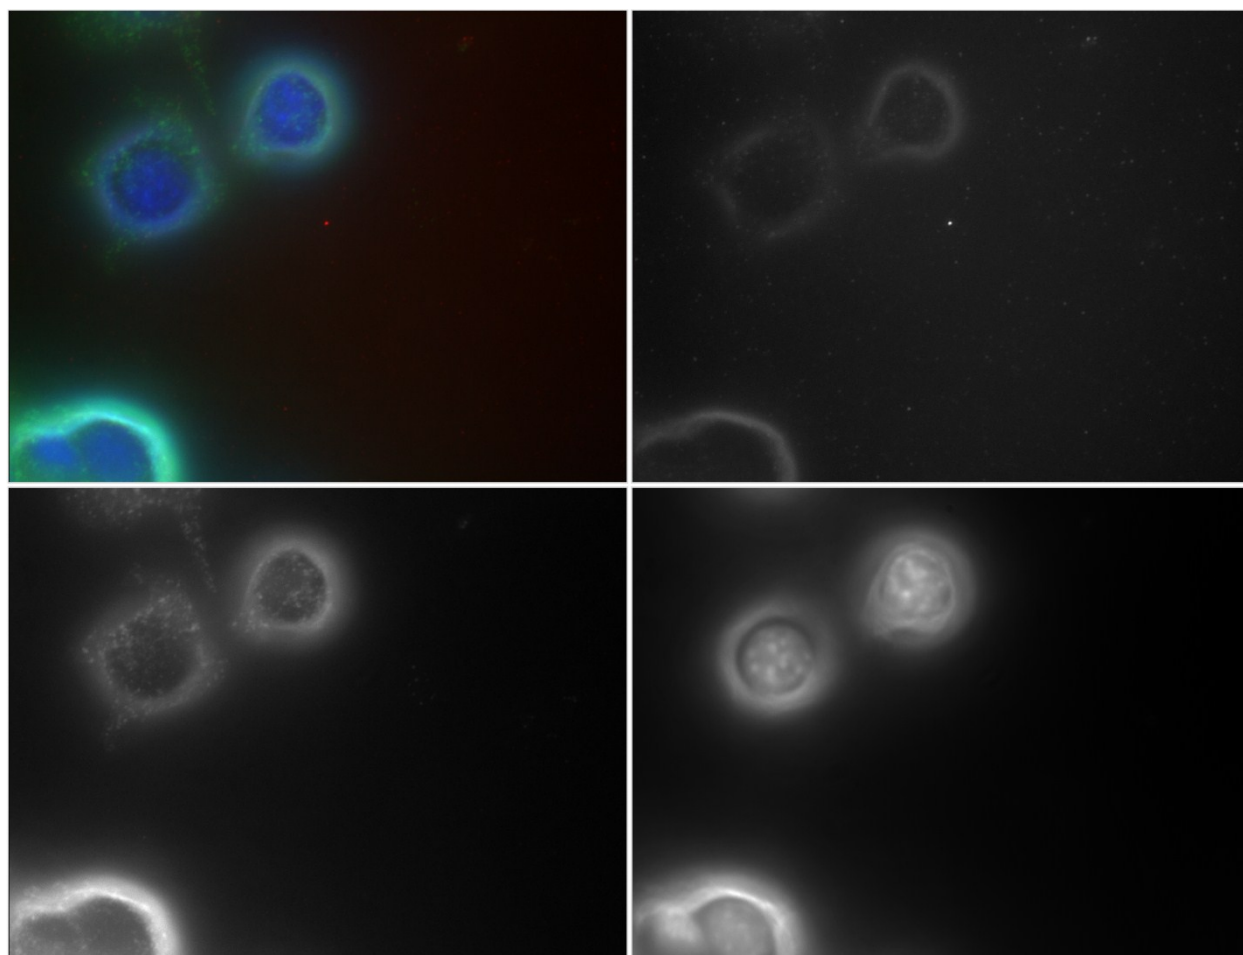

**Figure S4.** Epifluorescent image (top left) and its red (top right), green (bottom left), and blue (bottom right) channels of the control cells with undetectable intracellular fullerene (red channel).
